# Supplementary material for: Hypertension, Sarcopenia, and Global Cognitive Function in Community-Dwelling Older Women: A Preliminary Study
Source: Hindawi journal article supplement (doi:10.1155/2018/9758040), 2018-07-02
Supplement: f1 [file 9758040.f1.pdf]

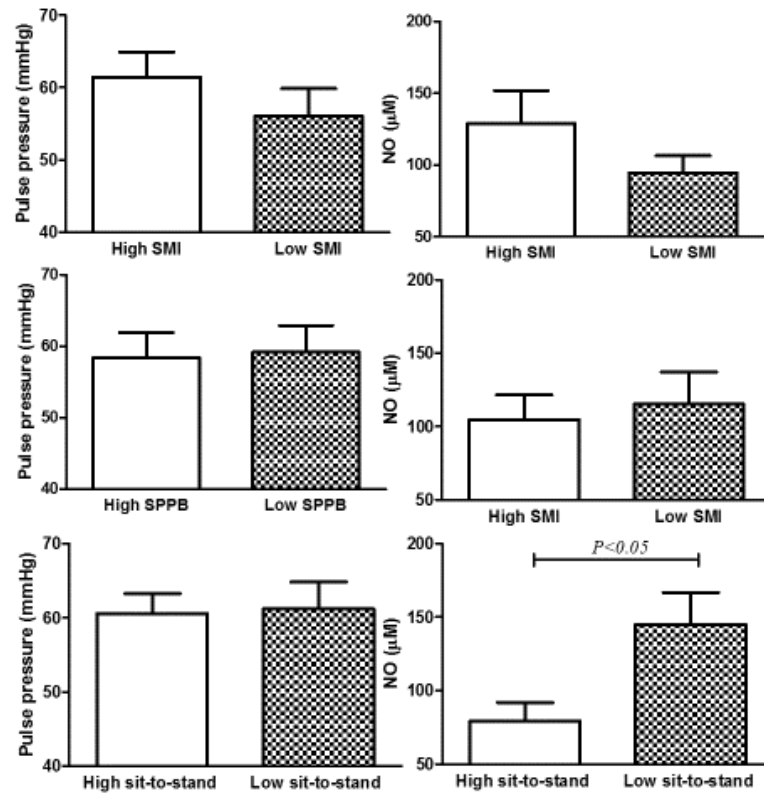

1

2 **Figure 1 - SM. Pulse pressure and Nitric oxide (NO) bioavailability according to**  
 3 **sarcopenic parameters in hypertensive patients.**
